# Supplementary material for: Genetic Analysis of Cadmium Tolerance And Exploring Its Inheritance Nature In Bread Wheat
Source: Research Square preprint supplement (doi:10.21203/rs.3.rs-417444/v1), 2021-05-11
Supplement: Supplementary file 1 [file c1cef8c93e18bec55ec11f27.docx]

**Table S1.** Names, pedigree and origin of used wheat genotypes as parents

| **Origin** | **Pedigree** | **Name** |
| --- | --- | --- |
| Egypt | MIL/BUC//Seri: CM 93046-8M-OY-OM-2Y-OB. | **Giza-168** |
| Egypt | Maya (S) Mou (S)//CMH 74A 592/3/ Sakha 8 *25 D 1002-4sd-3sd-1sd-0sd. | **Sids-6** |
| ICARDA | GEN/3/Gov/AZ//MUS"S"/4/Sannine/Ald"S" ACS-W-9174-10 IZ-5 IZ-0 IZ. | **ACSAD-925** |
| Egypt | MAYA74"S"/0N//1160-147/3/BB/GLL/4/CHAT "S"/CROW"S" | **Gemmeiza-10** |
| ICARDA | ACSAD 529//Yr/Sprw"S"ACS-W/8023-1IZ-2I Z-0IZ | **ACSAD-935** |
| Egypt | N.S.732/Pim/Veery(S) sd 735- 4sd-1sd 0sd/3/ CM 87688 – 02910P m-5Y-OH-Osy-1M-0Y | **Line-1** |
